# Supplementary material
Source: publisher site journal article supplement (https://www.dovepress.com/article/270149)
Supplement: Supplementary file 1 [file get_supplementary_file.php]

**Supplementary Table 1 Prediction of miRNAs with potential binding sites to PCED1B-AS1 by DIANA database**

| Gene_ID(Gene_Name)          | Mirna_Name(miRBase_version) | miTG-score |
|-----------------------------|-----------------------------|------------|
| ENSG00000247774(PCED1B-AS1) | hsa-miR-6769b-5p            | 0.989      |
| ENSG00000247774(PCED1B-AS1) | hsa-miR-619-5p              | 0.988      |
| ENSG00000247774(PCED1B-AS1) | hsa-miR-6757-5p             | 0.977      |
| ENSG00000247774(PCED1B-AS1) | hsa-miR-7856-5p             | 0.957      |
| ENSG00000247774(PCED1B-AS1) | hsa-miR-4505                | 0.945      |
| ENSG00000247774(PCED1B-AS1) | hsa-miR-4729                | 0.945      |
| ENSG00000247774(PCED1B-AS1) | hsa-miR-6516-3p             | 0.945      |
| ENSG00000247774(PCED1B-AS1) | hsa-miR-6799-3p             | 0.94       |
| ENSG00000247774(PCED1B-AS1) | hsa-miR-769-3p              | 0.939      |
| ENSG00000247774(PCED1B-AS1) | hsa-miR-548u                | 0.932      |
| ENSG00000247774(PCED1B-AS1) | hsa-miR-4251                | 0.926      |
| ENSG00000247774(PCED1B-AS1) | hsa-miR-888-5p              | 0.925      |
| ENSG00000247774(PCED1B-AS1) | hsa-miR-450b-3p             | 0.921      |
| ENSG00000247774(PCED1B-AS1) | hsa-miR-1910-3p             | 0.918      |
| ENSG00000247774(PCED1B-AS1) | hsa-miR-411-3p              | 0.916      |
| ENSG00000247774(PCED1B-AS1) | hsa-miR-4478                | 0.915      |
| ENSG00000247774(PCED1B-AS1) | hsa-miR-6511a-5p            | 0.912      |
| ENSG00000247774(PCED1B-AS1) | hsa-miR-4419b               | 0.911      |
| ENSG00000247774(PCED1B-AS1) | hsa-miR-7856-5p             | 0.91       |
| ENSG00000247774(PCED1B-AS1) | hsa-miR-379-3p              | 0.909      |
| ENSG00000247774(PCED1B-AS1) | hsa-miR-6884-5p             | 0.907      |
| ENSG00000247774(PCED1B-AS1) | hsa-miR-3929                | 0.904      |
| ENSG00000247774(PCED1B-AS1) | hsa-miR-4722-5p             | 0.896      |
| ENSG00000247774(PCED1B-AS1) | hsa-miR-6831-5p             | 0.891      |
| ENSG00000247774(PCED1B-AS1) | hsa-miR-485-5p              | 0.889      |
| ENSG00000247774(PCED1B-AS1) | hsa-miR-1295b-5p            | 0.88       |
| ENSG00000247774(PCED1B-AS1) | hsa-miR-5696                | 0.869      |
| ENSG00000247774(PCED1B-AS1) | hsa-miR-450b-5p             | 0.865      |
| ENSG00000247774(PCED1B-AS1) | hsa-miR-215-3p              | 0.862      |
| ENSG00000247774(PCED1B-AS1) | hsa-miR-7515                | 0.862      |
| ENSG00000247774(PCED1B-AS1) | hsa-miR-6807-5p             | 0.859      |
| ENSG00000247774(PCED1B-AS1) | hsa-miR-6506-5p             | 0.857      |
| ENSG00000247774(PCED1B-AS1) | hsa-miR-4733-5p             | 0.855      |
| ENSG00000247774(PCED1B-AS1) | hsa-miR-584-3p              | 0.855      |
| ENSG00000247774(PCED1B-AS1) | hsa-miR-664b-3p             | 0.846      |
| ENSG00000247774(PCED1B-AS1) | hsa-miR-509-3p              | 0.843      |
| ENSG00000247774(PCED1B-AS1) | hsa-miR-579-3p              | 0.842      |

|                             |                    |       |
|-----------------------------|--------------------|-------|
| ENSG00000247774(PCED1B-AS1) | <b>hsa-miR-484</b> | 0.841 |
| ENSG00000247774(PCED1B-AS1) | hsa-miR-3127-3p    | 0.835 |
| ENSG00000247774(PCED1B-AS1) | hsa-miR-4786-5p    | 0.834 |
| ENSG00000247774(PCED1B-AS1) | hsa-miR-6769a-5p   | 0.83  |
| ENSG00000247774(PCED1B-AS1) | hsa-miR-891a-3p    | 0.83  |
| ENSG00000247774(PCED1B-AS1) | hsa-miR-5589-5p    | 0.829 |
| ENSG00000247774(PCED1B-AS1) | hsa-miR-1827       | 0.827 |
| ENSG00000247774(PCED1B-AS1) | hsa-miR-5006-3p    | 0.827 |
| ENSG00000247774(PCED1B-AS1) | hsa-miR-3664-5p    | 0.826 |
| ENSG00000247774(PCED1B-AS1) | hsa-miR-370-3p     | 0.824 |
| ENSG00000247774(PCED1B-AS1) | hsa-miR-4680-3p    | 0.822 |
| ENSG00000247774(PCED1B-AS1) | hsa-miR-205-3p     | 0.821 |
| ENSG00000247774(PCED1B-AS1) | hsa-miR-4743-3p    | 0.815 |
| ENSG00000247774(PCED1B-AS1) | hsa-miR-6778-5p    | 0.814 |
| ENSG00000247774(PCED1B-AS1) | hsa-miR-665        | 0.809 |
| ENSG00000247774(PCED1B-AS1) | hsa-miR-3622b-3p   | 0.807 |
| ENSG00000247774(PCED1B-AS1) | hsa-miR-4524a-3p   | 0.806 |
| ENSG00000247774(PCED1B-AS1) | hsa-miR-8080       | 0.806 |
| ENSG00000247774(PCED1B-AS1) | hsa-miR-548ag      | 0.803 |
| ENSG00000247774(PCED1B-AS1) | hsa-miR-335-3p     | 0.801 |
| ENSG00000247774(PCED1B-AS1) | hsa-miR-887-5p     | 0.8   |
| ENSG00000247774(PCED1B-AS1) | hsa-miR-6752-3p    | 0.799 |
| ENSG00000247774(PCED1B-AS1) | hsa-miR-5580-3p    | 0.798 |
| ENSG00000247774(PCED1B-AS1) | hsa-miR-3173-5p    | 0.797 |
| ENSG00000247774(PCED1B-AS1) | hsa-miR-128-3p     | 0.796 |
| ENSG00000247774(PCED1B-AS1) | hsa-miR-3975       | 0.794 |
| ENSG00000247774(PCED1B-AS1) | hsa-miR-6513-5p    | 0.794 |
| ENSG00000247774(PCED1B-AS1) | hsa-miR-4755-5p    | 0.793 |
| ENSG00000247774(PCED1B-AS1) | hsa-miR-5787       | 0.793 |
| ENSG00000247774(PCED1B-AS1) | hsa-miR-6753-5p    | 0.792 |
| ENSG00000247774(PCED1B-AS1) | hsa-miR-4477b      | 0.791 |
| ENSG00000247774(PCED1B-AS1) | hsa-miR-4457       | 0.785 |
| ENSG00000247774(PCED1B-AS1) | hsa-miR-548ba      | 0.783 |
| ENSG00000247774(PCED1B-AS1) | hsa-miR-6761-5p    | 0.783 |
| ENSG00000247774(PCED1B-AS1) | hsa-miR-1304-3p    | 0.782 |
| ENSG00000247774(PCED1B-AS1) | hsa-miR-219a-2-3p  | 0.78  |
| ENSG00000247774(PCED1B-AS1) | hsa-miR-432-3p     | 0.78  |
| ENSG00000247774(PCED1B-AS1) | hsa-miR-6849-3p    | 0.779 |
| ENSG00000247774(PCED1B-AS1) | hsa-miR-3155b      | 0.776 |
| ENSG00000247774(PCED1B-AS1) | hsa-miR-1178-5p    | 0.775 |

|                             |                  |       |
|-----------------------------|------------------|-------|
| ENSG00000247774(PCED1B-AS1) | hsa-miR-3155a    | 0.775 |
| ENSG00000247774(PCED1B-AS1) | hsa-miR-634      | 0.775 |
| ENSG00000247774(PCED1B-AS1) | hsa-miR-876-3p   | 0.774 |
| ENSG00000247774(PCED1B-AS1) | hsa-miR-4264     | 0.773 |
| ENSG00000247774(PCED1B-AS1) | hsa-miR-6840-3p  | 0.772 |
| ENSG00000247774(PCED1B-AS1) | hsa-miR-9500     | 0.772 |
| ENSG00000247774(PCED1B-AS1) | hsa-miR-451b     | 0.768 |
| ENSG00000247774(PCED1B-AS1) | hsa-miR-5701     | 0.768 |
| ENSG00000247774(PCED1B-AS1) | hsa-miR-6750-5p  | 0.768 |
| ENSG00000247774(PCED1B-AS1) | hsa-miR-6842-3p  | 0.768 |
| ENSG00000247774(PCED1B-AS1) | hsa-miR-377-3p   | 0.767 |
| ENSG00000247774(PCED1B-AS1) | hsa-miR-3613-3p  | 0.766 |
| ENSG00000247774(PCED1B-AS1) | hsa-miR-4635     | 0.765 |
| ENSG00000247774(PCED1B-AS1) | hsa-miR-10b-5p   | 0.764 |
| ENSG00000247774(PCED1B-AS1) | hsa-miR-4284     | 0.764 |
| ENSG00000247774(PCED1B-AS1) | hsa-miR-4768-3p  | 0.763 |
| ENSG00000247774(PCED1B-AS1) | hsa-miR-6864-5p  | 0.763 |
| ENSG00000247774(PCED1B-AS1) | hsa-miR-29b-2-5p | 0.762 |
| ENSG00000247774(PCED1B-AS1) | hsa-miR-1233-5p  | 0.761 |
| ENSG00000247774(PCED1B-AS1) | hsa-miR-151a-3p  | 0.761 |
| ENSG00000247774(PCED1B-AS1) | hsa-miR-4499     | 0.758 |
| ENSG00000247774(PCED1B-AS1) | hsa-miR-4795-3p  | 0.757 |
| ENSG00000247774(PCED1B-AS1) | hsa-miR-548ai    | 0.757 |
| ENSG00000247774(PCED1B-AS1) | hsa-miR-570-5p   | 0.757 |
| ENSG00000247774(PCED1B-AS1) | hsa-miR-5702     | 0.756 |
| ENSG00000247774(PCED1B-AS1) | hsa-miR-7977     | 0.756 |
| ENSG00000247774(PCED1B-AS1) | hsa-miR-4797-3p  | 0.754 |
| ENSG00000247774(PCED1B-AS1) | hsa-miR-6756-3p  | 0.752 |
| ENSG00000247774(PCED1B-AS1) | hsa-miR-10a-5p   | 0.751 |
| ENSG00000247774(PCED1B-AS1) | hsa-miR-10b-3p   | 0.751 |
| ENSG00000247774(PCED1B-AS1) | hsa-miR-126-5p   | 0.75  |
| ENSG00000247774(PCED1B-AS1) | hsa-miR-27a-3p   | 0.749 |
| ENSG00000247774(PCED1B-AS1) | hsa-miR-216a-3p  | 0.748 |
| ENSG00000247774(PCED1B-AS1) | hsa-miR-203a-3p  | 0.746 |
| ENSG00000247774(PCED1B-AS1) | hsa-miR-3065-5p  | 0.746 |
| ENSG00000247774(PCED1B-AS1) | hsa-miR-6769a-5p | 0.746 |
| ENSG00000247774(PCED1B-AS1) | hsa-miR-27b-3p   | 0.745 |
| ENSG00000247774(PCED1B-AS1) | hsa-miR-5095     | 0.745 |
| ENSG00000247774(PCED1B-AS1) | hsa-miR-2467-5p  | 0.744 |
| ENSG00000247774(PCED1B-AS1) | hsa-miR-3156-5p  | 0.741 |

|                             |                  |       |
|-----------------------------|------------------|-------|
| ENSG00000247774(PCED1B-AS1) | hsa-miR-7161-5p  | 0.74  |
| ENSG00000247774(PCED1B-AS1) | hsa-miR-3622a-3p | 0.739 |
| ENSG00000247774(PCED1B-AS1) | hsa-miR-3646     | 0.739 |
| ENSG00000247774(PCED1B-AS1) | hsa-miR-575      | 0.739 |
| ENSG00000247774(PCED1B-AS1) | hsa-miR-4650-3p  | 0.738 |
| ENSG00000247774(PCED1B-AS1) | hsa-miR-4676-5p  | 0.736 |
| ENSG00000247774(PCED1B-AS1) | hsa-miR-4513     | 0.734 |
| ENSG00000247774(PCED1B-AS1) | hsa-miR-6131     | 0.734 |
| ENSG00000247774(PCED1B-AS1) | hsa-miR-1245b-3p | 0.733 |
| ENSG00000247774(PCED1B-AS1) | hsa-miR-4775     | 0.733 |
| ENSG00000247774(PCED1B-AS1) | hsa-miR-4649-3p  | 0.732 |
| ENSG00000247774(PCED1B-AS1) | hsa-miR-6866-5p  | 0.732 |
| ENSG00000247774(PCED1B-AS1) | hsa-miR-3927-3p  | 0.728 |
| ENSG00000247774(PCED1B-AS1) | hsa-miR-4430     | 0.727 |
| ENSG00000247774(PCED1B-AS1) | hsa-miR-6855-3p  | 0.724 |
| ENSG00000247774(PCED1B-AS1) | hsa-miR-3680-3p  | 0.723 |
| ENSG00000247774(PCED1B-AS1) | hsa-miR-383-5p   | 0.723 |
| ENSG00000247774(PCED1B-AS1) | hsa-miR-4646-5p  | 0.722 |
| ENSG00000247774(PCED1B-AS1) | hsa-miR-4437     | 0.721 |
| ENSG00000247774(PCED1B-AS1) | hsa-miR-6880-5p  | 0.721 |
| ENSG00000247774(PCED1B-AS1) | hsa-miR-5187-5p  | 0.72  |
| ENSG00000247774(PCED1B-AS1) | hsa-miR-2278     | 0.718 |
| ENSG00000247774(PCED1B-AS1) | hsa-miR-3188     | 0.718 |
| ENSG00000247774(PCED1B-AS1) | hsa-miR-6823-5p  | 0.718 |
| ENSG00000247774(PCED1B-AS1) | hsa-miR-1912     | 0.717 |
| ENSG00000247774(PCED1B-AS1) | hsa-miR-548ad-5p | 0.717 |
| ENSG00000247774(PCED1B-AS1) | hsa-miR-548ae-5p | 0.717 |
| ENSG00000247774(PCED1B-AS1) | hsa-miR-548aq-5p | 0.717 |
| ENSG00000247774(PCED1B-AS1) | hsa-miR-548ay-5p | 0.717 |
| ENSG00000247774(PCED1B-AS1) | hsa-miR-548d-5p  | 0.717 |
| ENSG00000247774(PCED1B-AS1) | hsa-miR-6500-3p  | 0.717 |
| ENSG00000247774(PCED1B-AS1) | hsa-miR-541-3p   | 0.716 |
| ENSG00000247774(PCED1B-AS1) | hsa-miR-6876-3p  | 0.716 |
| ENSG00000247774(PCED1B-AS1) | hsa-miR-6077     | 0.715 |
| ENSG00000247774(PCED1B-AS1) | hsa-miR-4272     | 0.714 |
| ENSG00000247774(PCED1B-AS1) | hsa-miR-4674     | 0.714 |
| ENSG00000247774(PCED1B-AS1) | hsa-miR-515-5p   | 0.714 |
| ENSG00000247774(PCED1B-AS1) | hsa-miR-519e-5p  | 0.714 |
| ENSG00000247774(PCED1B-AS1) | hsa-miR-3928-3p  | 0.713 |
| ENSG00000247774(PCED1B-AS1) | hsa-miR-548y     | 0.712 |

|                             |                  |       |
|-----------------------------|------------------|-------|
| ENSG00000247774(PCED1B-AS1) | hsa-miR-1306-5p  | 0.71  |
| ENSG00000247774(PCED1B-AS1) | hsa-miR-4538     | 0.71  |
| ENSG00000247774(PCED1B-AS1) | hsa-miR-548b-5p  | 0.71  |
| ENSG00000247774(PCED1B-AS1) | hsa-miR-548i     | 0.71  |
| ENSG00000247774(PCED1B-AS1) | hsa-miR-6742-3p  | 0.71  |
| ENSG00000247774(PCED1B-AS1) | hsa-miR-661      | 0.709 |
| ENSG00000247774(PCED1B-AS1) | hsa-miR-223-3p   | 0.708 |
| ENSG00000247774(PCED1B-AS1) | hsa-miR-548ab    | 0.708 |
| ENSG00000247774(PCED1B-AS1) | hsa-miR-6876-5p  | 0.708 |
| ENSG00000247774(PCED1B-AS1) | hsa-miR-612      | 0.707 |
| ENSG00000247774(PCED1B-AS1) | hsa-miR-7703     | 0.707 |
| ENSG00000247774(PCED1B-AS1) | hsa-miR-6728-5p  | 0.706 |
| ENSG00000247774(PCED1B-AS1) | hsa-miR-194-5p   | 0.705 |
| ENSG00000247774(PCED1B-AS1) | hsa-miR-518a-5p  | 0.705 |
| ENSG00000247774(PCED1B-AS1) | hsa-miR-527      | 0.705 |
| ENSG00000247774(PCED1B-AS1) | hsa-miR-5683     | 0.702 |
| ENSG00000247774(PCED1B-AS1) | hsa-miR-548as-5p | 0.7   |
| ENSG00000247774(PCED1B-AS1) | hsa-miR-583      | 0.7   |

---
